# Supplementary material
Source: Springer Nature journal article supplement (https://www.springermedizin.de/resource/supplementary/12875_2005_140_MOESM1_ESM.pdf/9436524)

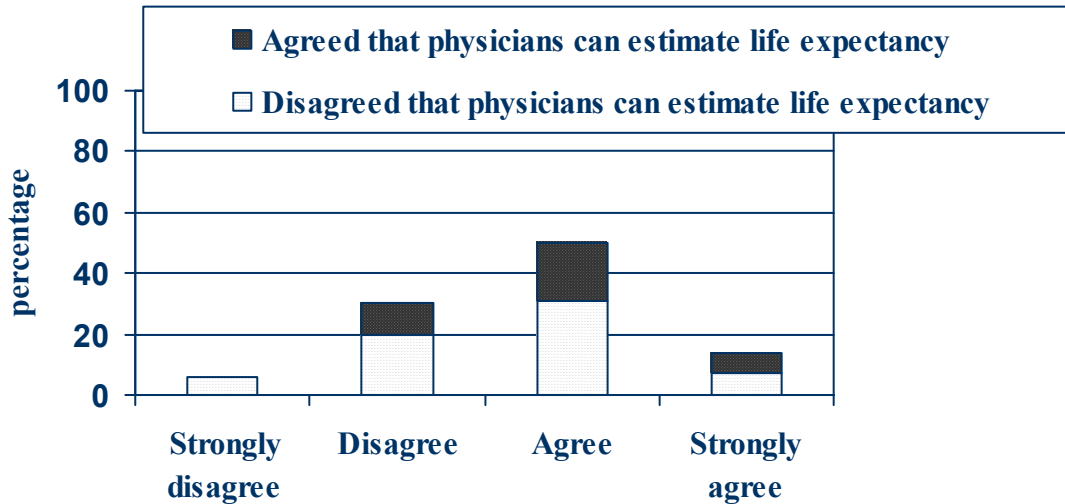

Supplement: MOESM1 [file 9436524]
